# Supplementary material for: Contrast enhancement pattern predicts poor survival for patients with non-WNT/SHH medulloblastoma tumours
Source: PubMed Central journal article supplement (PMC4439433; doi:10.1007/s11060-015-1779-0), 2015-04-11

POLISH PAEDIATRIC NEUROONCOLOGY GROUP (PPNG)

MEDULLOBLASTOMA IN CHILDREN OLDER THAN 3 years TREATMENT PROTOCOL

1. STANDARD RISK GROUP (non-anaplastic tumor, totally or subtotally resected (tumor rest less than 1,5cm<sup>3</sup>), no tumor cells in the csf, no visible metastases in the initial MRI of the brain and spine)

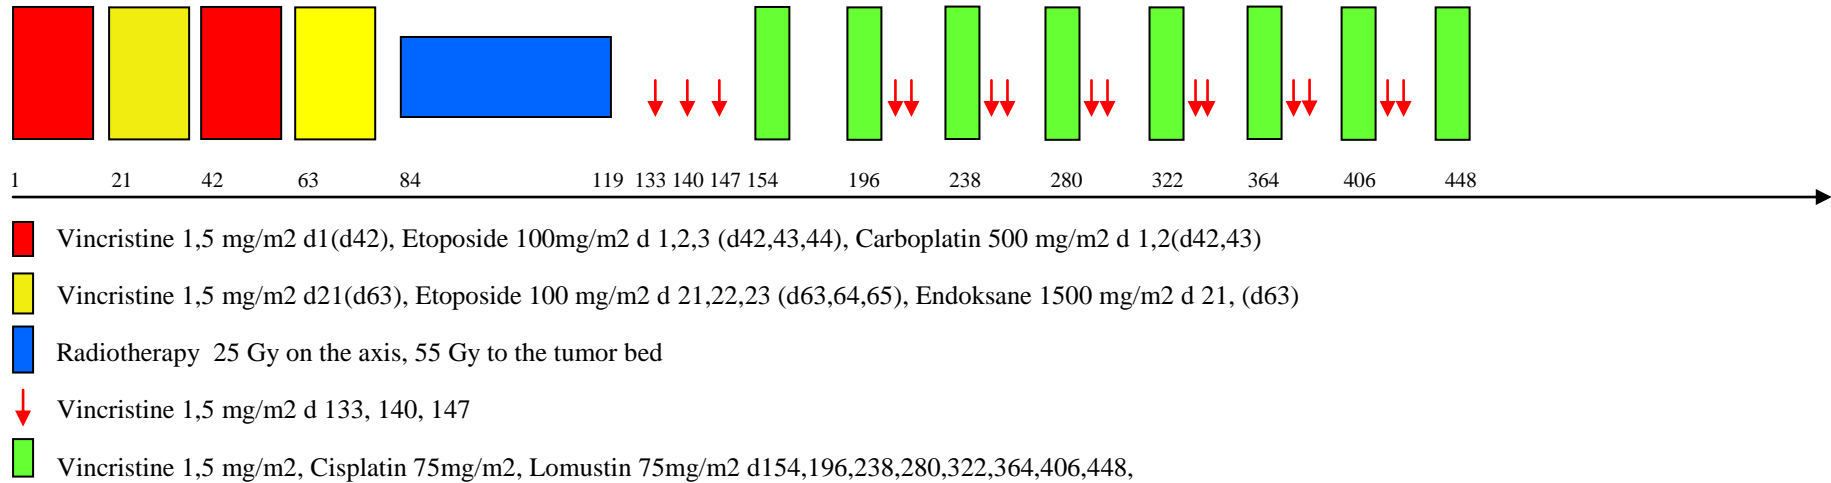

2. HIGH RISK GROUP (LCA medulloblastoma or tumor rest > 1,5 cm<sup>3</sup> or tumor cells in the csf (+), or any visible metastases in the MRI of the brain or spine)

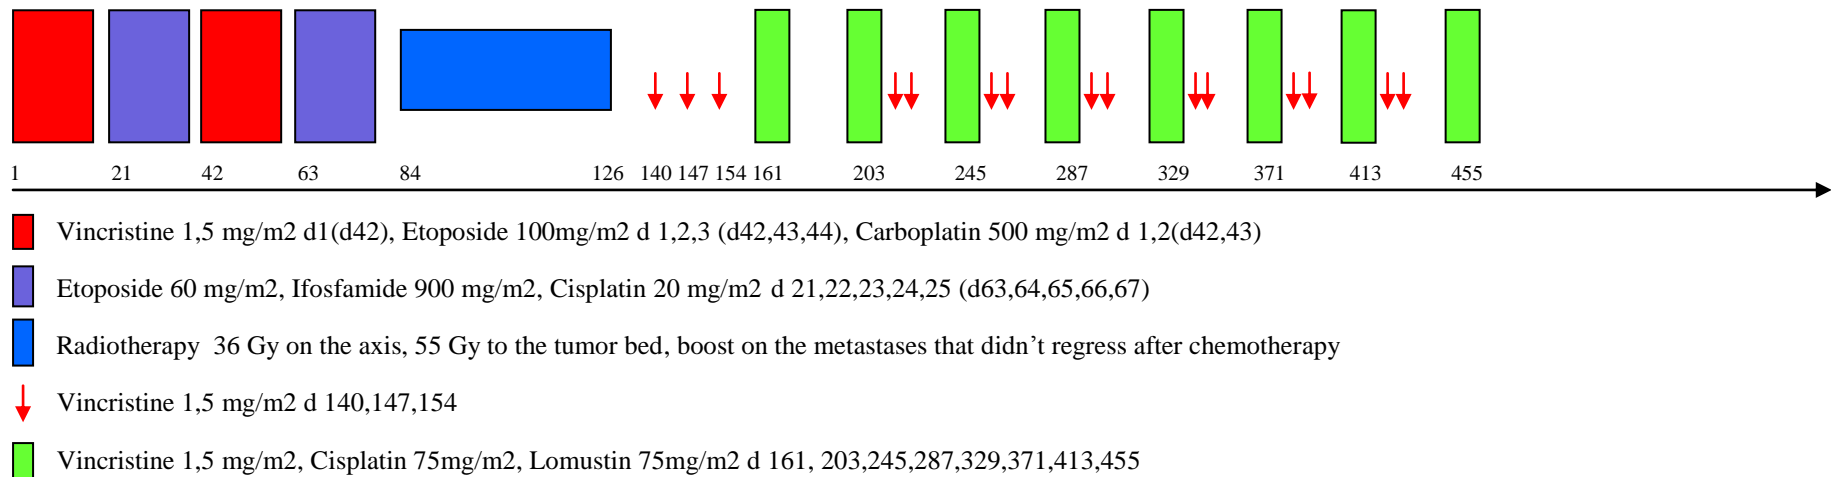

Supplement: 11060_2015_1779_MOESM1_ESM.pdf [file 11060_2015_1779_MOESM1_ESM.pdf]
